## Index to Volume I.

| ARTICLES                                                                                                                                                                                                      |  | Page |
|---------------------------------------------------------------------------------------------------------------------------------------------------------------------------------------------------------------|--|------|
| ATKINS, W. R. G. A quantitative consideration of some factors concerned in plant growth in water. Part I. Some Physical Factors .....                                                                         |  | 99   |
| ATKINS, W. R. G. A quantitative consideration of some factors concerned in plant growth in water. Part II. Some Chemical Factors .....                                                                        |  | 197  |
| CARRUTHERS, J. N. A new Current Measuring Instrument for the Purposes of Fishery Research .....                                                                                                               |  | 127  |
| GRAHAM, MICHAEL. A precise method for determining the first "winter" zone in cod scales .....                                                                                                                 |  | 344  |
| HJORT, JOHAN. Fluctuations in the year classes of important food fishes. . . .                                                                                                                                |  | 5    |
| JESPERSEN, P. Age Determination of Eels from Norfolk and Cumberland. . . .                                                                                                                                    |  | 227  |
| JOHANSEN, A. C. On the remarkable quantities of Haddock in the Belt Sea during the Winter of 1925-26, and causes leading to the same. . . . .                                                                 |  | 140  |
| PALMÉN, E. Über die Verteilung von Temperatur und Salzgehalt des Wassers im Finnischen Meerbusen bei stationärem Stromzustande .....                                                                          |  | 327  |
| PETTERSSON, OTTO. Hydrography, Climate and Fisheries in the Transition Area                                                                                                                                   |  | 305  |
| PETTERSSON, OTTO. Currents and Fish-Migrations in the Transition Area. . . .                                                                                                                                  |  | 322  |
| ROBERTS, C. H. Oil Pollution .....                                                                                                                                                                            |  | 245  |
| RUSSELL, E. S. & EDSEER, T. The Relation between Cod-end Mesh and Size of Fish caught .....                                                                                                                   |  | 39   |
| SUND, OSCAR. Graphical Calculation of specific volume and dynamic depth. .                                                                                                                                    |  | 235  |
| SUND, OSCAR. Correction of temperatures. . . . .                                                                                                                                                              |  | 242  |
| REVIEWS                                                                                                                                                                                                       |  |      |
| AMEMYIYA, IKUSAKU. Notes on experiments on the early developmental stages of the Portuguese, American and English native oysters, with special reference to the effect of varying salinity. (R. SPÄRCK) ..... |  | 367  |
| ATKINS, W. R. G. Seasonal Changes in the Silica Content of Natural Waters in Relation to the Phytoplankton. (J. R. BRUCE) .....                                                                               |  | 282  |
| ATKINS, W. R. G. Notes on the Preservation of Fishing Nets by means of Copper Soaps. (R. SOUTHERN) .....                                                                                                      |  | 289  |
| ATKINS, W. R. G. The Phosphate Content of Fresh and Salt Waters in its Relationship to the Growth of the Algal Plankton. (J. R. BRUCE) .....                                                                  |  | 373  |
| AVERINZEV, S. W. (Institute of Fisheries, Moscow.) Results of Hydrological Work conducted in the Region of Cape Kanin (Barents Sea) in connection with Fisheries. (J. R. LUMBY) .....                         |  | 171  |
| BARANOV, F. On the Question of the Dynamics of the Fishing Industry. (T. EDSEER) .....                                                                                                                        |  | 291  |

|                                                                                                                                                                                                             | Page |
|-------------------------------------------------------------------------------------------------------------------------------------------------------------------------------------------------------------|------|
| BLEGVAD, H. Continued Studies on the Quantity of Fish-Food in the Sea-Bottom.<br>(E. FORD) .....                                                                                                            | 365  |
| BORLEY, J. O. Distribution of the Food Fishes in the North Sea during 1923<br>& 1924 with Notes on the Natural History of the Food Fishes of the North<br>Sea by D. E. THURSBY-PELHAM. (E. EHRENBAUM) ..... | 371  |
| CARRUTHERS, J. N. The Water Movements in the Southern North Sea. Part I.<br>The Surface Drift. (G. GILSON) .....                                                                                            | 55   |
| CHEVEY, P. Rapport sur les Pêcheries ou Bouchots de la Bai du Mont Saint<br>Michel. (W. WALLACE) .....                                                                                                      | 67   |
| DANNEVIG, ALF. On the Growth of the Cod and the Formation of Annual Zones<br>in the Scales. (MICHAEL GRAHAM) .....                                                                                          | 361  |
| FILLON, R. Les traitements préservateurs des filets de pêche en coton. (W. R. G.<br>ATKINS) .....                                                                                                           | 161  |
| GARDINER, A. C., and GRAHAM, MICHAEL. The Working Error of Petersen's<br>Young Fish Trawl. (G. P. FARRAN) .....                                                                                             | 61   |
| GIRAL, J. Quelques observations sur l'emploi de l'eau normale en océanographie.<br>(D. J. MATTHEWS) .....                                                                                                   | 284  |
| GRAHAM, MICHAEL, and CARRUTHERS, J. N. The Distribution of Pelagic Stages<br>of the Cod in the North Sea in 1924 in Relation to the System of Currents.<br>(OSCAR SUND) .....                               | 290  |
| HARDY, A. C. The Herring in Relation to its Animal Environment. Part II.<br>(C. H. OSTENFELD) .....                                                                                                         | 357  |
| HARVEY, H. W. Hydrography of the English Channel. (J. R. LUMBY) .....                                                                                                                                       | 59   |
| HARVEY, H. W. Nitrate in the Sea. (J. R. BRUCE) .....                                                                                                                                                       | 281  |
| HEINCKE, F. & BÜCKMANN, A. Die Ueberfischung der Nordsee und die Wirkungen<br>der Kriegsschonzeit auf ihren Schollenbestand. (Miss D. E. THURSBY-PELHAM)                                                    | 173  |
| HESSELE, CHR. The Herrings along the Baltic coast of Sweden. (W. C. HODGSON)                                                                                                                                | 163  |
| HICKLING, C. F. A new Type of Luminescence in Fishes. (E. S. RUSSELL) .....                                                                                                                                 | 66   |
| HODGSON, WILLIAM C. Investigations into the Age, Length and Maturity of the<br>Herring of the Southern North Sea. Part II. The Composition of the Catches<br>in 1922—24. (A. C. JOHANSEN) .....             | 167  |
| HUNT, O. D. On the Amphipod Genus <i>Talitrus</i> , with a description of a new<br>species from the Scilly Isles, <i>T. dorrieni</i> , n. sp. (R. SOUTHERN) .....                                           | 163  |
| JENKINS, J. TRAVIS. The Fishes of the British Isles. (Miss D. T. THURSBY-PELHAM)                                                                                                                            | 70   |
| JENSEN, AD. S. On the Fishery of the Greenlanders. (GEORGE T. ATKINSON)                                                                                                                                     | 73   |
| JOHANSEN, A. C. On the Influence of the Currents upon the Frequency of the<br>Mackerel in the Kattegat and adjacent parts of the Skagerak. (E. S. RUSSELL)                                                  | 65   |
| JOHANSEN, A. C. On the Diurnal Vertical Movements of the Young of some<br>Fishes in Danish Waters. (F. S. RUSSELL) .....                                                                                    | 279  |
| JOHNSTONE, JAMES. A Study of the Oceans. (J. N. CARRUTHERS) .....                                                                                                                                           | 286  |
| KYLE, HARRY M. The Biology of Fishes. (J. JOHNSTONE) .....                                                                                                                                                  | 278  |
| LEBOUR, MARIE V. The Dinoflagellates of Northern Seas. (G. P. FARRAN) .....                                                                                                                                 | 63   |
| LEBOUR, MARIE V. The Euphausiidae in the Neighbourhood of Plymouth.<br>(R. SOUTHERN) .....                                                                                                                  | 289  |
| DE MORGAN, W. Further Observations on Marine Ciliates Living in the Labora-<br>tory Tanks at Plymouth. (R. SOUTHERN) .....                                                                                  | 290  |
| ORR, A. P. The Nitrite Content of Sea-Water. (J. R. BRUCE) .....                                                                                                                                            | 280  |
| ORTON, J. H. & AWATI, P. R. Modification by habitat in the Portuguese oyster.<br>(R. SPÄRCK) .....                                                                                                          | 367  |

|                                                                                                                                                                                                                      | Page |
|----------------------------------------------------------------------------------------------------------------------------------------------------------------------------------------------------------------------|------|
| ORTON, J. H. On Lunar Periodicity in spawning of normally grown Falmouth oysters ( <i>Ostrea edulis</i> ) in 1925, with a comparison of the spawning capacity of normally grown and dumpy oysters. (R. SPÄRCK) ..... | 368  |
| PAVILLARD, J. Report on the Danish Oceanographical Expeditions 1908—1910 to the Mediterranean and adjacent seas. Vol. II. J. 4. <i>Bacillariales</i> . (E. J. SALISBURY).....                                        | 360  |
| PETTERSSON, O. The Swedish saving trawl. (F. M. DAVIS) .....                                                                                                                                                         | 69   |
| RUSSELL, F. S., The Vertical Distribution of Marine Macroplankton. An Observation on Diurnal Changes. (G. P. FARRAN) .....                                                                                           | 62   |
| RUSSELL, F. S. The Vertical Distribution of Marine Macroplankton II. (G. P. FARRAN) .....                                                                                                                            | 283  |
| SARS, G. O. Copépodes particulièrement bathypélagiques provenant des campagnes scientifiques du Prince Albert Ier de Monaco. (G. P. FARRAN).....                                                                     | 359  |
| SAVAGE, R. E., The Food of the Oyster. (G. P. FARRAN).....                                                                                                                                                           | 64   |
| SAVAGE, R. E. The Plankton of a Herring Ground. (G. P. FARRAN).....                                                                                                                                                  | 360  |
| SCHULZ, B. Aerologische und Hydrographische Beobachtungen der Deutschen Marine-Stationen während der Kriegszeit 1914—1918. Heft I und II. (J. N. CARRUTHERS) .....                                                   | 354  |
| SCHULZ, B. Bericht über die Fortschritte der Ozeanographie 1915—24. (J. N. CARRUTHERS) .....                                                                                                                         | 356  |
| STEPHENSON, T. A. On a New British Sea Anemone. (R. SOUTHERN).....                                                                                                                                                   | 162  |
| STEPHENSON, E. MARY. On the Anatomy and Relationships of New or Little known British Actinaria. (R. SOUTHERN).....                                                                                                   | 162  |
| SUND, OSCAR. Merking av sei i Nordland Sommeren 1921. (MICHAEL GRAHAM) 160                                                                                                                                           | 160  |
| SUND, OSCAR. Nyt Fiskertermometer (New Fishery Thermometer). (E. S. RUSSELL).....                                                                                                                                    | 171  |
| SÆMUNDSSON, B. Age and Growth of Haddock ( <i>Gadus aeglefinus</i> L.) and Whiting ( <i>Gadus merlangus</i> L.) in Icelandic waters. (H. THOMPSON).....                                                              | 169  |
| TCHUGUNOV, N. L. Essay on the Quantitative Exploration of the Benthos-Production on the North part of the Caspian Sea and of the typical Basins in the Volga Delta. (E. FORD) .....                                  | 363  |
| WATKIN, E. EMRYS. Investigations on Cardigan Bay Herring. Parts I & II. (W. C. HODGSON).....                                                                                                                         | 370  |
| WOOD, HENRY, & MCGEE, GEORGE. Aircraft Experiments for the locating of Herring Shoals in Scottish waters. (H. HELDT).....                                                                                            | 68   |
| Essay-Review on Works concerning the Valuation of the Southern North Sea. (C. G. JOH. PETERSEN) .....                                                                                                                | 157  |

## NOTES AND CORRESPONDENCE

|                                                                                                     |                |
|-----------------------------------------------------------------------------------------------------|----------------|
| Editorial Note.....                                                                                 | 3              |
| Notices nécrologiques:—                                                                             |                |
| L'Amiral Augusto Eduardo Neuparth } .....                                                           | between 196-97 |
| Miss Sigrid Hansen }                                                                                |                |
| JOHANSEN, A. C. Cruise of the Danish research vessel "Dana" in the Danish waters October 1925 ..... | 75             |
| JOHNSTONE, J. Frequency Curves and Herring Investigation .....                                      | 276            |
| Correspondence. C. G. JOH. PETERSEN .....                                                           | 353            |

## BIBLIOGRAPHY

|                                                                                             |     |
|---------------------------------------------------------------------------------------------|-----|
| Selected Bibliography of Fishery Publications, Part I, by E. J. ALLEN.....                  | 77  |
| Selected Bibliography of Fishery Publications, Part II, by E. J. ALLEN.....                 | 175 |
| Addendum to Part I of the Bibliography. (Communicated by Prof. E. VAN EVER-<br>DINGEN)..... | 193 |
| Current Bibliography prepared by the Editor.....                                            | 293 |
| Current Bibliography prepared by the Editor.....                                            | 375 |
